# Supplementary material for: A Low Tacrolimus Concentration/Dose Ratio Increases the Risk for the Development of Acute Calcineurin Inhibitor-Induced Nephrotoxicity
Source: PubMed Central journal article supplement (PMC6832469; doi:10.3390/jcm8101586), 2019-10-02
Supplement: jcm-08-01586-s001.pdf [file jcm-08-01586-s001.pdf]

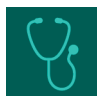

# Supplemental Material

Table S1. Patient characteristics: Pulse wave analysis.

|                                                                                           | slow metabolizers ( <i>n</i> = 90) | fast metabolizers ( <i>n</i> = 30) | <i>p</i> -value    |
|-------------------------------------------------------------------------------------------|------------------------------------|------------------------------------|--------------------|
| Age (years, mean ± SD)                                                                    | 54.3 ± 13.6                        | 54.1 ± 14.2                        | 0.936 <sup>a</sup> |
| Male sex, <i>n</i> (%)                                                                    | 55 (61.1)                          | 16 (53.3)                          | 0.522 <sup>c</sup> |
| BMI (kg/m <sup>2</sup> , mean ± SD)                                                       | 26.8 ± 4.2                         | 26.4 ± 4.4                         | 0.627 <sup>a</sup> |
| Pre-existing recipient hypertension, <i>n</i> (%)                                         | 81 (90.0)                          | 28 (93.3)                          | 0.729 <sup>c</sup> |
| Diagnosis of ESRD, <i>n</i> (%)                                                           |                                    |                                    |                    |
| Hypertension                                                                              | 7 (7.8)                            | 1 (3.3)                            |                    |
| Diabetes                                                                                  | 11 (12.2)                          | 3 (10.0)                           |                    |
| Polycystic kidney disease                                                                 | 15 (16.7)                          | 3 (10.0)                           |                    |
| Obstructive nephropathy                                                                   | 4 (4.4)                            | 2 (6.7)                            |                    |
| Glomerulonephritis                                                                        | 23 (25.6)                          | 7 (23.3)                           | 0.596 <sup>d</sup> |
| FSGS                                                                                      | 4 (4.4)                            | (0.0)                              |                    |
| Interstitial nephritis                                                                    | 7 (7.8)                            | 4 (13.3)                           |                    |
| Other                                                                                     | 14 (15.6)                          | 9 (30.0)                           |                    |
| Unknown                                                                                   | 5 (5.6)                            | 1 (3.3)                            |                    |
| Dialysis vintage (months, median (IQR))                                                   | 41.5 (59)                          | 65.0 (96)                          | 0.154 <sup>a</sup> |
| ≥ 1 prior kidney transplant, <i>n</i> (%)                                                 | 10 (11.1)                          | 4 (13.3)                           | 0.570 <sup>c</sup> |
| Living donor transplantation                                                              | 34 (37.8)                          | 9 (30.0)                           | 0.514 <sup>c</sup> |
| Number HLA mismatch, <i>n</i> (%)                                                         |                                    |                                    |                    |
| 0–3                                                                                       | 29 (32.2)                          | 11 (36.7)                          | 0.661 <sup>c</sup> |
| 4–6                                                                                       | 61 (67.8)                          | 19 (63.3)                          |                    |
| Current PRA, <i>n</i> (%)                                                                 |                                    |                                    |                    |
| 0–20 %                                                                                    | 85 (94.4)                          | 26 (86.7)                          | 0.225 <sup>c</sup> |
| > 20 %                                                                                    | 5 (5.6)                            | 4 (13.3)                           |                    |
| Cold ischemia time (hours, mean ± SD)                                                     | 8.1 ± 5.7                          | 8.9 ± 5.3                          | 0.553 <sup>a</sup> |
| Warm ischemia time (min, mean ± SD)                                                       | 34.3 ± 6.9                         | 35.2 ± 10.7                        | 0.698 <sup>a</sup> |
| Donor age (years, mean ± SD)                                                              | 49.4 ± 13.2                        | 51.0 ± 13.9                        | 0.575 <sup>a</sup> |
| Donor male sex, <i>n</i> (%)                                                              | 40 (44.4)                          | 20 (66.7)                          | 0.057 <sup>c</sup> |
| Recipient eGFR at 1yr (mL/min per 1.73 m <sup>2</sup> , mean ± SD)                        | 56.8 ± 19.8                        | 48.6 ± 16.9                        | 0.070 <sup>a</sup> |
| Recipient eGFR at pulse wave analysis (mL/min per 1.73 m <sup>2</sup> , mean ± SD)        | 49.9 ± 14.2                        | 42.8 ± 15.8                        | 0.024 <sup>a</sup> |
| Time from Tx to Measurement (years, median, (1 <sup>st</sup> , 3 <sup>rd</sup> quartile)) | 4.5 (3.0, 6.0)                     | 4.6 (1.0, 6.7)                     | 0.913 <sup>b</sup> |
| Peripheral systolic blood pressure (mmHg, mean ± SD)                                      | 130 ± 15                           | 133 ± 17                           | 0.438 <sup>a</sup> |
| Peripheral diastolic blood pressure (mmHg, mean ± SD)                                     | 85 ± 10                            | 88 ± 13                            | 0.213 <sup>a</sup> |
| Mean arterial pressure (mmHg, mean ± SD)                                                  | 106 ± 11                           | 108 ± 14                           | 0.377 <sup>a</sup> |

|                                                                          |                 |                 |                    |
|--------------------------------------------------------------------------|-----------------|-----------------|--------------------|
| <b>Central systolic blood pressure (mmHg, mean <math>\pm</math> SD)</b>  | 120 $\pm$ 14    | 124 $\pm$ 16    | 0.283 <sup>a</sup> |
| <b>Central diastolic blood pressure (mmHg, mean <math>\pm</math> SD)</b> | 86 $\pm$ 10     | 88 $\pm$ 14     | 0.398 <sup>a</sup> |
| <b>Pulse wave velocity (m/s, mean <math>\pm</math> SD)</b>               | 8.0 $\pm$ 1.8   | 8.1 $\pm$ 1.9   | 0.935 <sup>a</sup> |
| <b>Augmentation index (mean <math>\pm</math> SD)</b>                     | 19.3 $\pm$ 14.6 | 14.8 $\pm$ 13.0 | 0.141 <sup>a</sup> |
| <b>Total vascular resistance (s*mmHg/mL)</b>                             | 1.3 $\pm$ 0.2   | 1.3 $\pm$ 0.2   | 0.737 <sup>a</sup> |

<sup>a</sup> Student's *t*-test, <sup>b</sup> Mann-Whitney U test, <sup>c</sup> Fisher's exact test, <sup>d</sup> Pearson's chi-squared test.

Table S2. Patient demographics: Glycocalyx assessment.

|                                                                                         | slow metabolizers (n = 14) | fast metabolizers (n = 14) | p-value             |
|-----------------------------------------------------------------------------------------|----------------------------|----------------------------|---------------------|
| Age (years, mean ± SD)                                                                  | 50.7 ± 13.3                | 48.7 ± 9.7                 | 0.659 <sup>a</sup>  |
| Male sex, n (%)                                                                         | 6 (42.9)                   | 7 (50.0)                   | 1.000 <sup>c</sup>  |
| BMI (kg/m <sup>2</sup> , mean ± SD)                                                     | 23.6 ± 3.5                 | 25.7 ± 5.8                 | 0.272 <sup>a</sup>  |
| Pre-existing recipient hypertension, n (%)                                              | 13 (92.9)                  | 12 (85.7)                  | 1.000 <sup>c</sup>  |
| Diagnosis of ESRD, n (%)                                                                |                            |                            |                     |
| Hypertension                                                                            | 1 (7.1)                    | 2 (14.3)                   |                     |
| Diabetes                                                                                | 1 (7.1)                    | 0 (0.0)                    |                     |
| Polycystic kidney disease                                                               | 1 (7.1)                    | 0 (0.0)                    |                     |
| Obstructive nephropathy                                                                 | 0 (0.0)                    | 1 (7.1)                    |                     |
| Glomerulonephritis                                                                      | 5 (35.7)                   | 4 (28.6)                   | 0.793 <sup>d</sup>  |
| FSGS                                                                                    | 1 (7.1)                    | 1 (7.1)                    |                     |
| Interstitial nephritis                                                                  | 3 (21.4)                   | 1 (7.1)                    |                     |
| Other                                                                                   | 1 (7.1)                    | 4 (28.6)                   |                     |
| Unknown                                                                                 | 1 (7.1)                    | 1 (7.1)                    |                     |
| Dialysis vintage (months, median (IQR))                                                 | 56.5 ± 36.9                | 60.1 ± 37.0                | 0.808 <sup>a</sup>  |
| ≥ 1 prior kidney transplant, n (%)                                                      | 3 (21.4)                   | 4 (28.6)                   | 1.000 <sup>c</sup>  |
| Living donor transplantation                                                            | 3 (21.4)                   | 2 (14.3)                   | 1.000 <sup>c</sup>  |
| Number HLA mismatch, n (%)                                                              |                            |                            |                     |
| 0–3                                                                                     | 9 (64.3)                   | 10 (71.4)                  | 1.000 <sup>c</sup>  |
| 4–6                                                                                     | 5 (35.7)                   | 4 (28.6)                   |                     |
| Current PRA, n (%)                                                                      |                            |                            |                     |
| 0–20 %                                                                                  | 11 (78.6)                  | 12 (85.7)                  | 1.000 <sup>c</sup>  |
| > 20 %                                                                                  | 3 (21.4)                   | 2 (14.3)                   |                     |
| Cold ischemia time (hours, mean ± SD)                                                   | 8.3 ± 5.2                  | 10.2 ± 4.7                 | 0.307 <sup>a</sup>  |
| Warm ischemia time (min, mean ± SD)                                                     | 31.8 ± 6.9                 | 32.2 ± 8.0                 | 0.684 <sup>a</sup>  |
| Donor age (years, mean ± SD)                                                            | 53.8 ± 13.8                | 51.1 (9.1)                 | 0.546 <sup>a</sup>  |
| Donor male sex, n (%)                                                                   | 6 (42.9)                   | 7 (50.0)                   | 1.000 <sup>c</sup>  |
| Recipient eGFR at measurement (ml/min per 1.73 m <sup>2</sup> , mean ± SD)              | 51.5 ± 13.9                | 45.8 ± 14.2                | 0.292 <sup>a</sup>  |
| Time from Tx to Measurement (years, median, 1 <sup>st</sup> , 3 <sup>rd</sup> quartile) | 4.0 (1.9, 12.0)            | 5.1 (2.4, 7.6)             | 0.874 <sup>b</sup>  |
| Tac blood trough concentration (ng/ml, mean ± SD)                                       | 3.5 ± 1.4                  | 8.1 ± 2.6                  | <0.001 <sup>a</sup> |
| Tac daily dose (mg, mean ± SD)                                                          | 6.6 ± 2.3                  | 6.1 ± 1.3                  | 0.495 <sup>a</sup>  |
| Tac C/D ratio (ng/mL × 1/mg, mean ± SD)                                                 | 2.1 ± 0.8                  | 0.8 ± 0.2                  | <0.001 <sup>a</sup> |

<sup>a</sup>Student's *t*-test, <sup>b</sup>Mann-Whitney U test, <sup>c</sup>Fisher's exact test, <sup>d</sup>Pearson's chi-squared test.

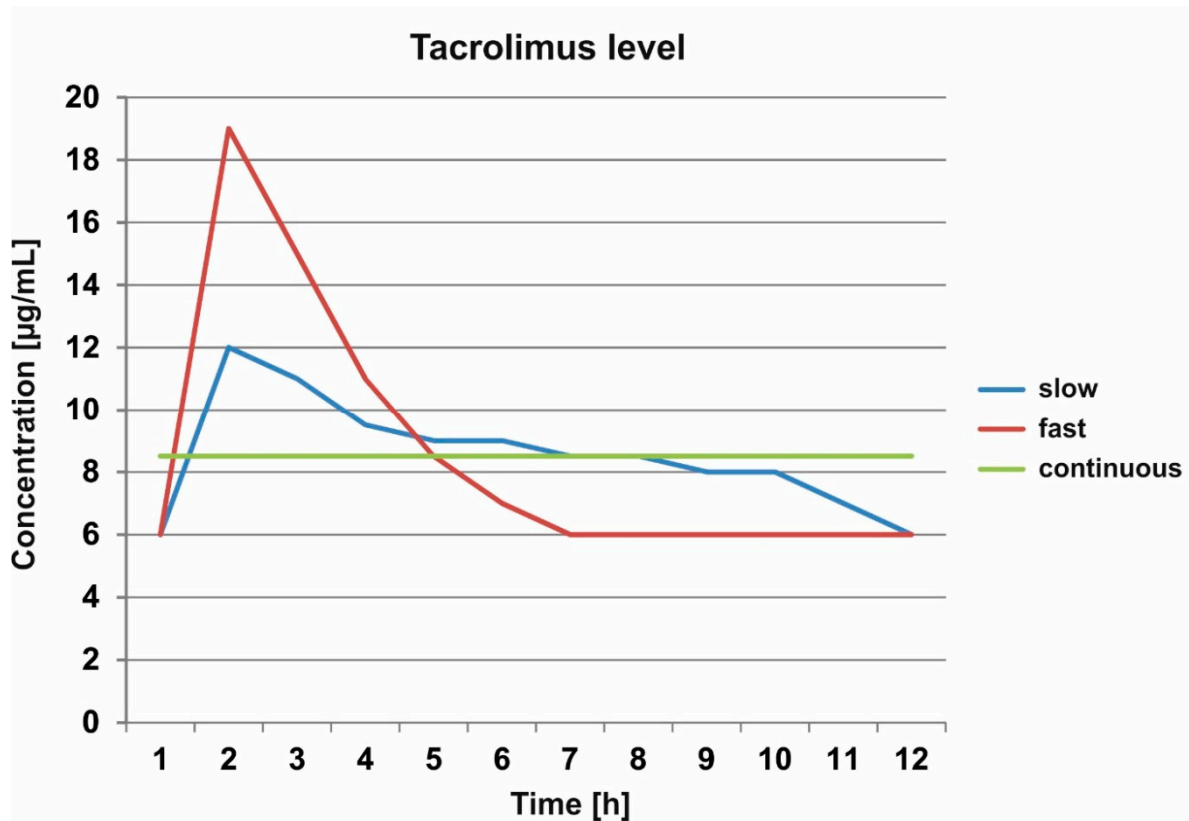

Figure S1. Pharmacokinetic profiles used for NRK cell incubation. Culture medium was changed every hour using the indicated Tac concentrations.
